# Supplementary material
Source: Royal Society of Chemistry journal article supplement (doi:10.1039/d6tc00923a)
Supplement: d6tc00923a1.pdf [file d6tc00923a1.pdf]

## Supporting Information

**Microstructure and transport modulation in Zn(Al)O-containing Bi<sub>2</sub>Te<sub>2.7</sub>Se<sub>0.3</sub> films**

**Yen-Ling Wang, Chuan-Wen Wang, Yu-Chieh Shih, Karan Giri, Yi-Ting Wu,  
Shin-Syuan Huang, Chun-Hua Chen\***

Department of Materials Science and Engineering, National Yang Ming Chiao Tung  
University, 1001 Ta-Hsueh Rd., Hsin-Chu, 30010 Taiwan, ROC.

E-mail: [ChunHuaChen@nycu.edu.tw](mailto:ChunHuaChen@nycu.edu.tw), [ChunHuaChen@mail.nctu.edu.tw](mailto:ChunHuaChen@mail.nctu.edu.tw)

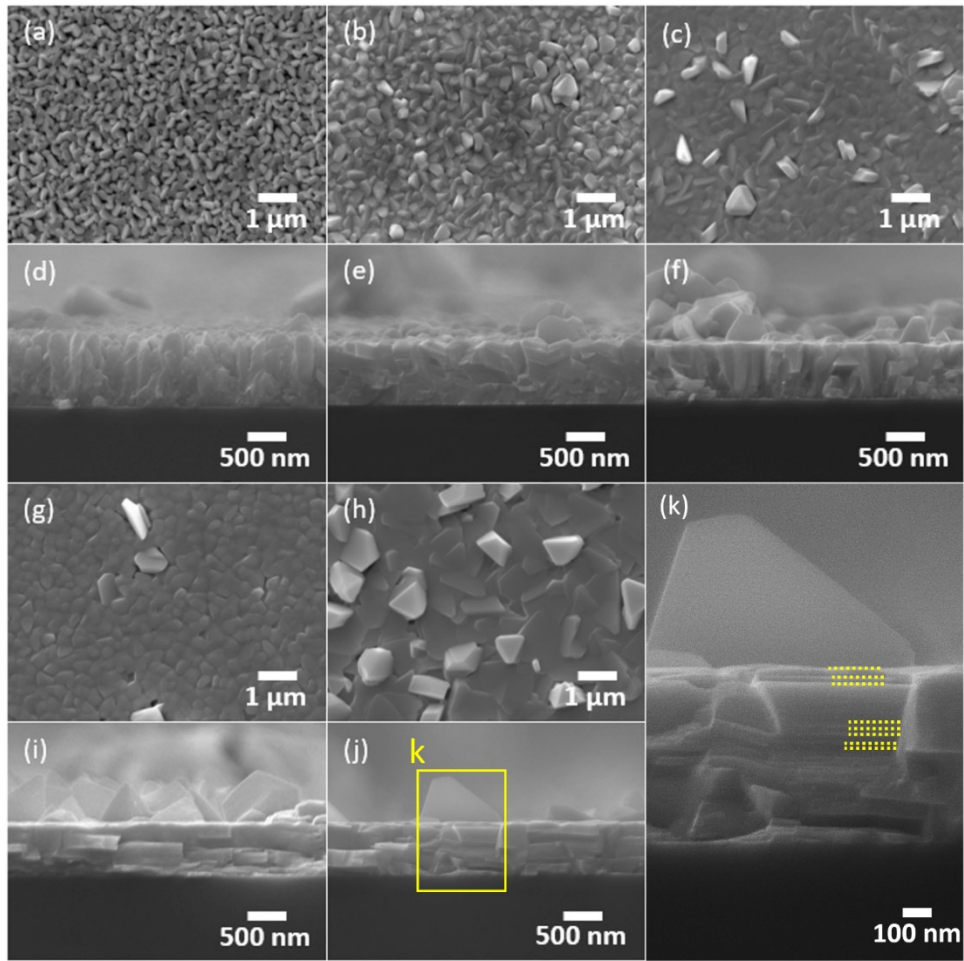

**Figure S1.** Top-view and cross-sectional SEM images of BTS films deposited at (a, d) 250 °C, (b, e) 300 °C, (c, f) 350 °C, (g, i) 400 °C, and (h, j) 450 °C. (k) Close-up image showing the periodic layered structure of the BTS:AZO films.

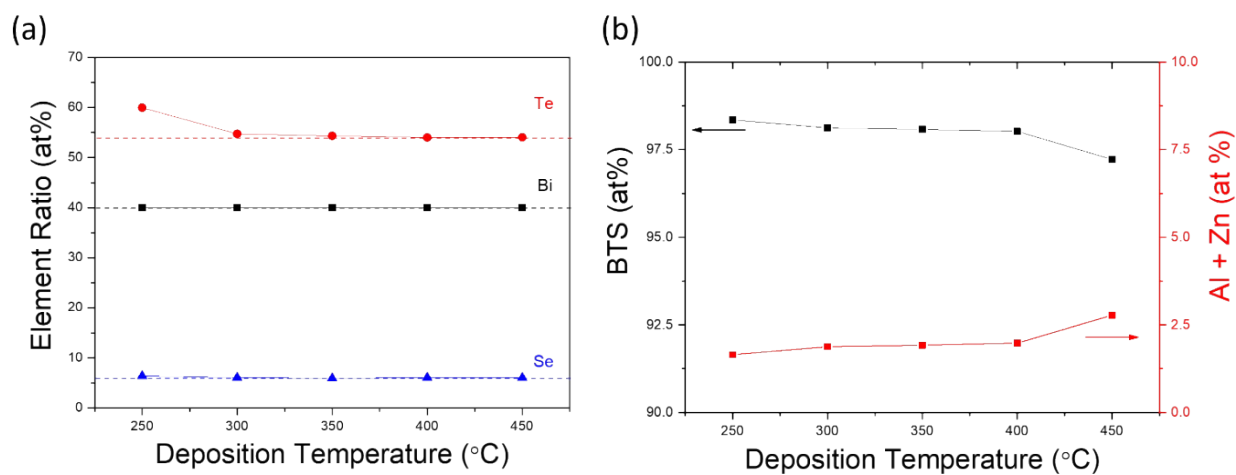

**Figure S2.** (a) Normalized composition ratios of Bi, Te, and Se, and (b) Normalized atomic fractions of the BTS-related elements (Bi + Te + Se) and (Al + Zn) as a function of deposition temperature..

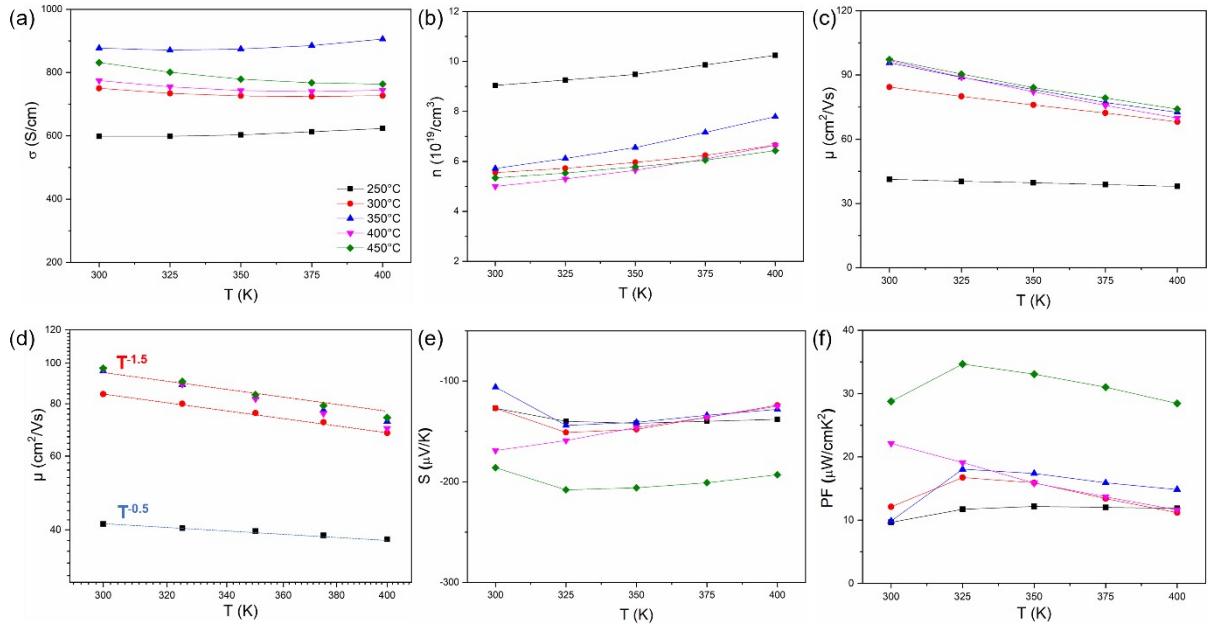

**Figure S3.** Temperature dependence of (a) electrical conductivity, (b) carrier concentration, (c) carrier mobility, (d) Log-log plot of mobility versus temperature, (e) Seebeck coefficient, and (f) power factor (PF) of the BTS films.

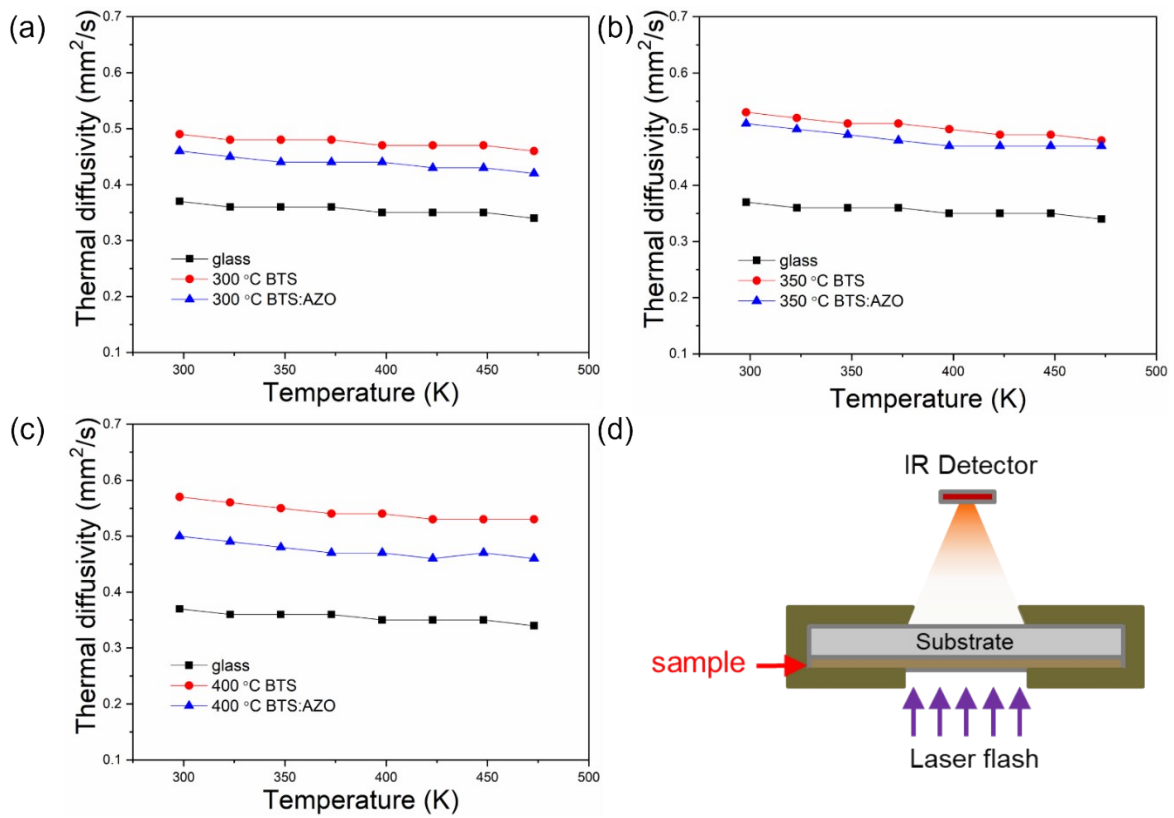

**Figure S4.** Thermal diffusion coefficients of the glass substrate, BTS, and BTS:AZO films deposited at (a) 300 °C, (b) 350 °C, and (c) 400 °C. (d) Schematic diagram of the thermal diffusion measurement setup.

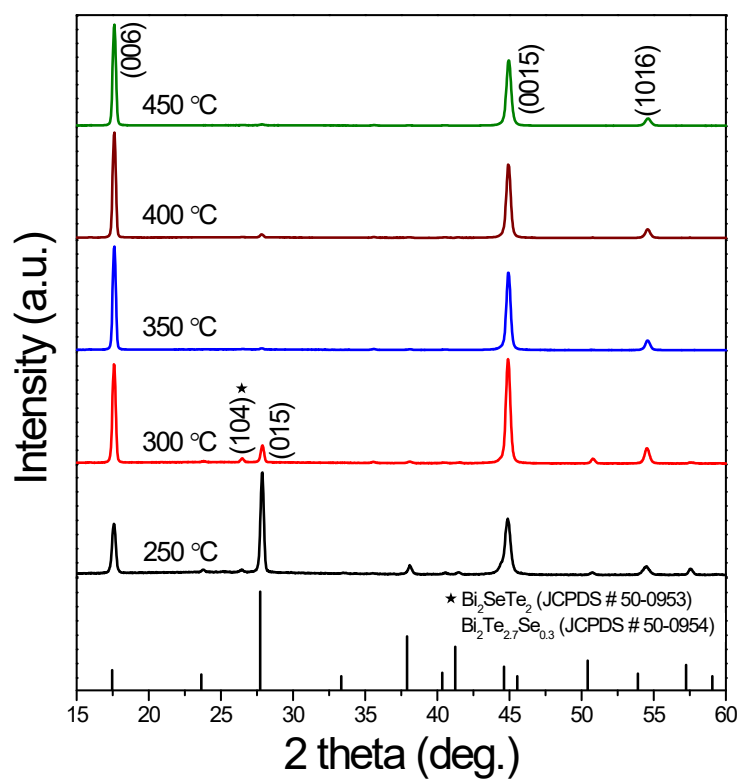

**Figure S5.** XRD patterns of the BTS films deposited at various temperatures.

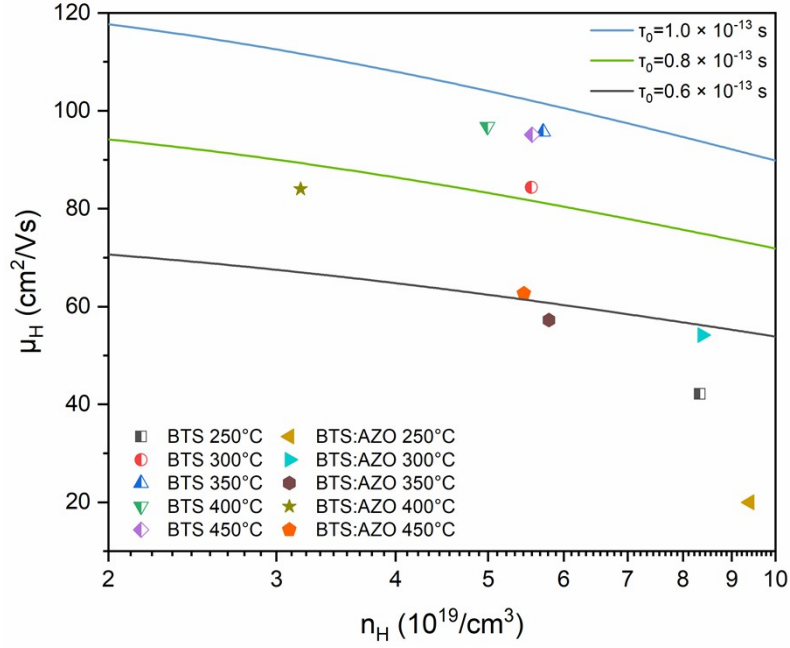

**Figure S6.** Carrier-density dependent carrier mobility at 300 K.

The carrier mobility ( $\mu$ ) depends on the conductive effective mass  $m_c^*$  and the average relaxation time ( $\tau$ ), which can be demonstrated by the following equations when acoustic phonon scattering dominates. Here, constant  $\tau_0$  is a  $n_H$ -independent relaxation time, and  $F_0$  and  $F_{1/2}$  are the Fermi integrals [1].

$$\mu = \frac{e(\tau)}{m_c^*} = \frac{2e\tau_0}{3m_c^*} \frac{F_0}{F_{1/2}} \quad (\text{Eq. 1})$$

The BTS:AZO films exhibit a relatively lower relaxation time ( $\tau_0$ ), suggesting more frequent carrier scattering. This result is likely due to the various defects introduced by the AZO doping, which increase the scattering events.

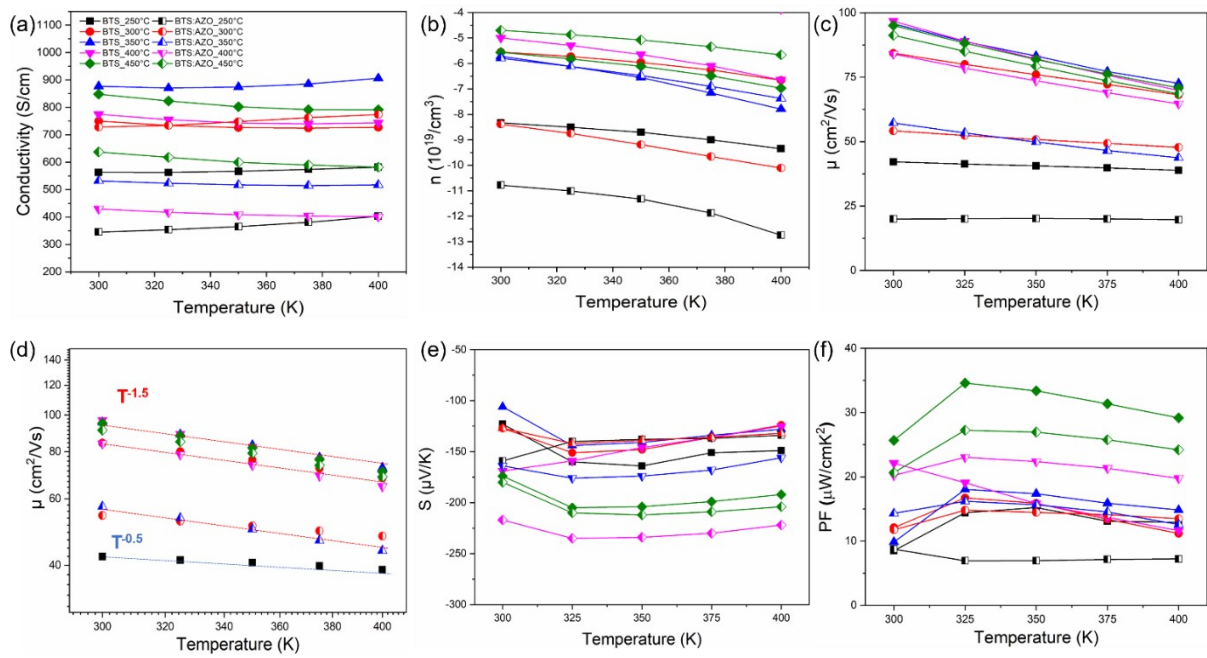

**Figure S7.** Temperature dependence of the (a) electrical conductivity, (b) carrier concentration, (c) carrier mobility, (d) mobility as a function of  $T^{-1}$ , (e) Seebeck coefficient, and (f) PF of the BTS and BTS:AZO films.

**Table S1.** Composition ratios of Bi, Te, and Se, and AZO doping concentrations in the BTS:AZO films deposited at various deposition temperatures.

| BTS:AZO | at%   |       |      |       |
|---------|-------|-------|------|-------|
|         | Bi    | Te    | Se   | Te/Bi |
| 250 °C  | 37.56 | 56.29 | 6.15 | 1.5   |
| 300 °C  | 39.67 | 54.32 | 6.01 | 1.48  |
| 350 °C  | 39.88 | 54.18 | 5.94 | 1.35  |
| 400 °C  | 39.97 | 53.97 | 6.06 | 1.35  |
| 450 °C  | 39.95 | 54.01 | 6.04 | 1.35  |

  

| BTS:AZO | at%  |      |       |
|---------|------|------|-------|
|         | Al   | Zn   | BTS   |
| 250 °C  | 0.54 | 1.11 | 98.35 |
| 300 °C  | 1.00 | 0.88 | 98.12 |
| 350 °C  | 0.84 | 1.08 | 98.08 |
| 400 °C  | 1.13 | 0.85 | 98.02 |
| 450 °C  | 1.06 | 1.72 | 97.22 |

**Table S2.** Lattice constants of the BTS and BTS:AZO films deposited at various temperatures.

| Sample | BTS     |       | BTS:AZO |       |
|--------|---------|-------|---------|-------|
|        | a=b (Å) | c (Å) | a=b (Å) | c (Å) |
| 250 °C | 4.36    | 30.25 | 4.36    | 30.27 |
| 300 °C | 4.36    | 30.25 | 4.35    | 30.29 |
| 350 °C | 4.36    | 30.21 | 4.36    | 30.24 |
| 400 °C | 4.36    | 30.21 | 4.36    | 30.26 |
| 450 °C | 4.37    | 30.20 | 4.35    | 30.23 |

**Table S3.** The full width at half maximum of the (006) diffraction peak and the grain size of the BTS and BTS:AZO films.

| Sample | BTS      |                 | BTS:AZO  |                 |
|--------|----------|-----------------|----------|-----------------|
|        | FWHM (°) | Grain size (nm) | FWHM (°) | Grain size (nm) |
| 250 °C | 0.286    | 29.1            | 0.271    | 30.7            |
| 300 °C | 0.254    | 32.8            | 0.308    | 27.1            |
| 350 °C | 0.246    | 33.9            | 0.258    | 32.4            |
| 400 °C | 0.246    | 33.9            | 0.256    | 32.6            |
| 450 °C | 0.249    | 33.5            | 0.249    | 33.5            |

**Table S4.** Thickness comparison between the BTS and BTS:AZO films

| TD (°C) | Sample  | Thickness |
|---------|---------|-----------|
| 250     | BTS     | 1153      |
|         | BTS:AZO | 1003      |
| 300     | BTS     | 890       |
|         | BTS:AZO | 880       |
| 350     | BTS     | 827       |
|         | BTS:AZO | 773       |
| 400     | BTS     | 789       |
|         | BTS:AZO | 753       |
| 450     | BTS     | 741       |
|         | BTS:AZO | 719       |

**Table S5.** Comparison of the thermoelectric properties of Bi<sub>2</sub>Te<sub>2.7</sub>Se<sub>0.3</sub>-based films with different compositions and modifications.

| Composition                                                                | S<br>( $\mu\text{V/K}$ ) | PF<br>( $\mu\text{W/cmK}^2$ ) | $\kappa$<br>(W/mK) | zT   | Year, Ref |
|----------------------------------------------------------------------------|--------------------------|-------------------------------|--------------------|------|-----------|
| Bi <sub>2</sub> Te <sub>2.7</sub> Se <sub>0.3</sub>                        | -180                     | 12                            | -                  | -    | 2010 [2]  |
| Pt <sub>0.060</sub> /Bi <sub>2</sub> Te <sub>2.7</sub> Se <sub>0.3</sub>   | -200                     | 35                            | 0.86               | 1.17 | 2014 [3]  |
| Bi <sub>2</sub> Te <sub>2.7</sub> Se <sub>0.3</sub>                        | -190                     | 18                            | 0.65               | 0.9  | 2017 [4]  |
| Bi <sub>2</sub> Te <sub>2.7</sub> Se <sub>0.3</sub>                        | -240                     | 45                            | -                  | 1.6  | 2019 [5]  |
| BTS-2Cu/Ni                                                                 | -200                     | 29.8                          | 0.93               | 0.97 | 2020 [6]  |
| Bi <sub>2</sub> Te <sub>3</sub> /Te                                        | -160                     | 14.6                          | -                  | -    | 2021 [7]  |
| Bi <sub>2</sub> Te <sub>3</sub>                                            | -180                     | 47                            | -                  | -    | 2021 [8]  |
| (CuI) <sub>0.002</sub> Bi <sub>2</sub> Te <sub>2.7</sub> Se <sub>0.3</sub> | -180                     | 63.5                          | 1.5                | 1.42 | 2022 [9]  |
| ZnO/BTS                                                                    | -210                     | 33.5                          | 0.81               | 1.25 | 2024 [10] |
| Bi <sub>2</sub> Te <sub>2.7</sub> Se <sub>0.3</sub>                        | -155                     | 35.1                          | 1.01               | 1.14 | 2026 [11] |

## References

- [1] H. Lee, *Thermoelectrics: design and materials*, John Wiley & Sons 2025.
- [2] X. Duan, Y. Jiang, *Applied surface science*, 256 (2010) 7365-7370.
- [3] T. Sun, M.K. Samani, N. Khosravian, K.M. Ang, Q. Yan, B.K. Tay, H.H. Hng, *Nano Energy*, 8 (2014) 223-230.
- [4] S.J. Kim, H. Choi, Y. Kim, J.H. We, J.S. Shin, H.E. Lee, M.-W. Oh, K.J. Lee, B.J. Cho, *Nano Energy*, 31 (2017) 258-263.
- [5] M. Tan, W.D. Liu, X.L. Shi, H. Gao, H. Li, C. Li, X.B. Liu, Y. Deng, Z.G. Chen, *Small Methods*, 3 (2019) 1900582.
- [6] Y. Wudil, M. Gondal, S. Rao, S. Kunwar, A. Alsayoud, *Materials Chemistry and Physics*, 253 (2020) 123321.
- [7] D.W. Ao, W.D. Liu, Y.X. Chen, M. Wei, B. Jabar, F. Li, X.L. Shi, Z.H. Zheng, G.X. Liang, X.H. Zhang, P. Fan, Z.G. Chen, *Advanced Science*, 9 (2022) 2103547.
- [8] M. Zhang, W. Liu, C. Zhang, S. Xie, Z. Li, F.Q. Hua, J.F. Luo, Z.H. Wang, W. Wang, F. Yan, Y. Cao, Y. Liu, Z.Y. Wang, C. Uher, X.F. Tang, *Acs Nano*, 15 (2021) 5706-5714.
- [9] C.L. Chen, T.H. Wang, Z.G. Yu, Y. Hutabalian, R.K. Vankayala, C.C. Chen, W.P. Hsieh, H.T. Jeng, D.H. Wei, Y.Y. Chen, *Advanced Science*, 9 (2022) 2201353.
- [10] Q. Hu, J. Guo, X. Zhao, C. Guan, S. Wang, Z. Zhao, *J Alloy Compd*, 1004 (2024) 175770.
- [11] Y. Xiong, Y. Shi, G. Dong, T. Wang, X. Chen, S. Zhou, E. Min, J. Feng, J. Li, R. Liu, *Journal of Materials Science & Technology*, 252 (2026) 48–56.
